# Supplementary material for: Evaluation of a Chronic Pain Screening Program Implemented in Primary Care
Source: PubMed Central journal article supplement (PMC8317006; doi:10.1001/jamanetworkopen.2021.18495), 2021-07-27
Supplement: jamanetwopen-e2118495-s001.pdf [file jamanetwopen-e2118495-s001.pdf]

## Supplementary Online Content

Bifulco L, Anderson DR, Blankson ML, et al. Evaluation of a chronic pain screening program implemented in primary care. *JAMA Netw Open*. 2021;4(7):e2118495. doi:10.1001/jamanetworkopen.2021.18495

**eFigure.** Chronic Pain Screening and PEG Workflow Process

**eTable.** List of Chronic Pain Diagnoses

This supplementary material has been provided by the authors to give readers additional information about their work.

**eFigure. Chronic Pain Screening and PEG Workflow Process**

Medical assistants administered chronic pain screening and follow-up and documented patient responses in a custom electronic health record smartform for provider and patient to review during the visit.

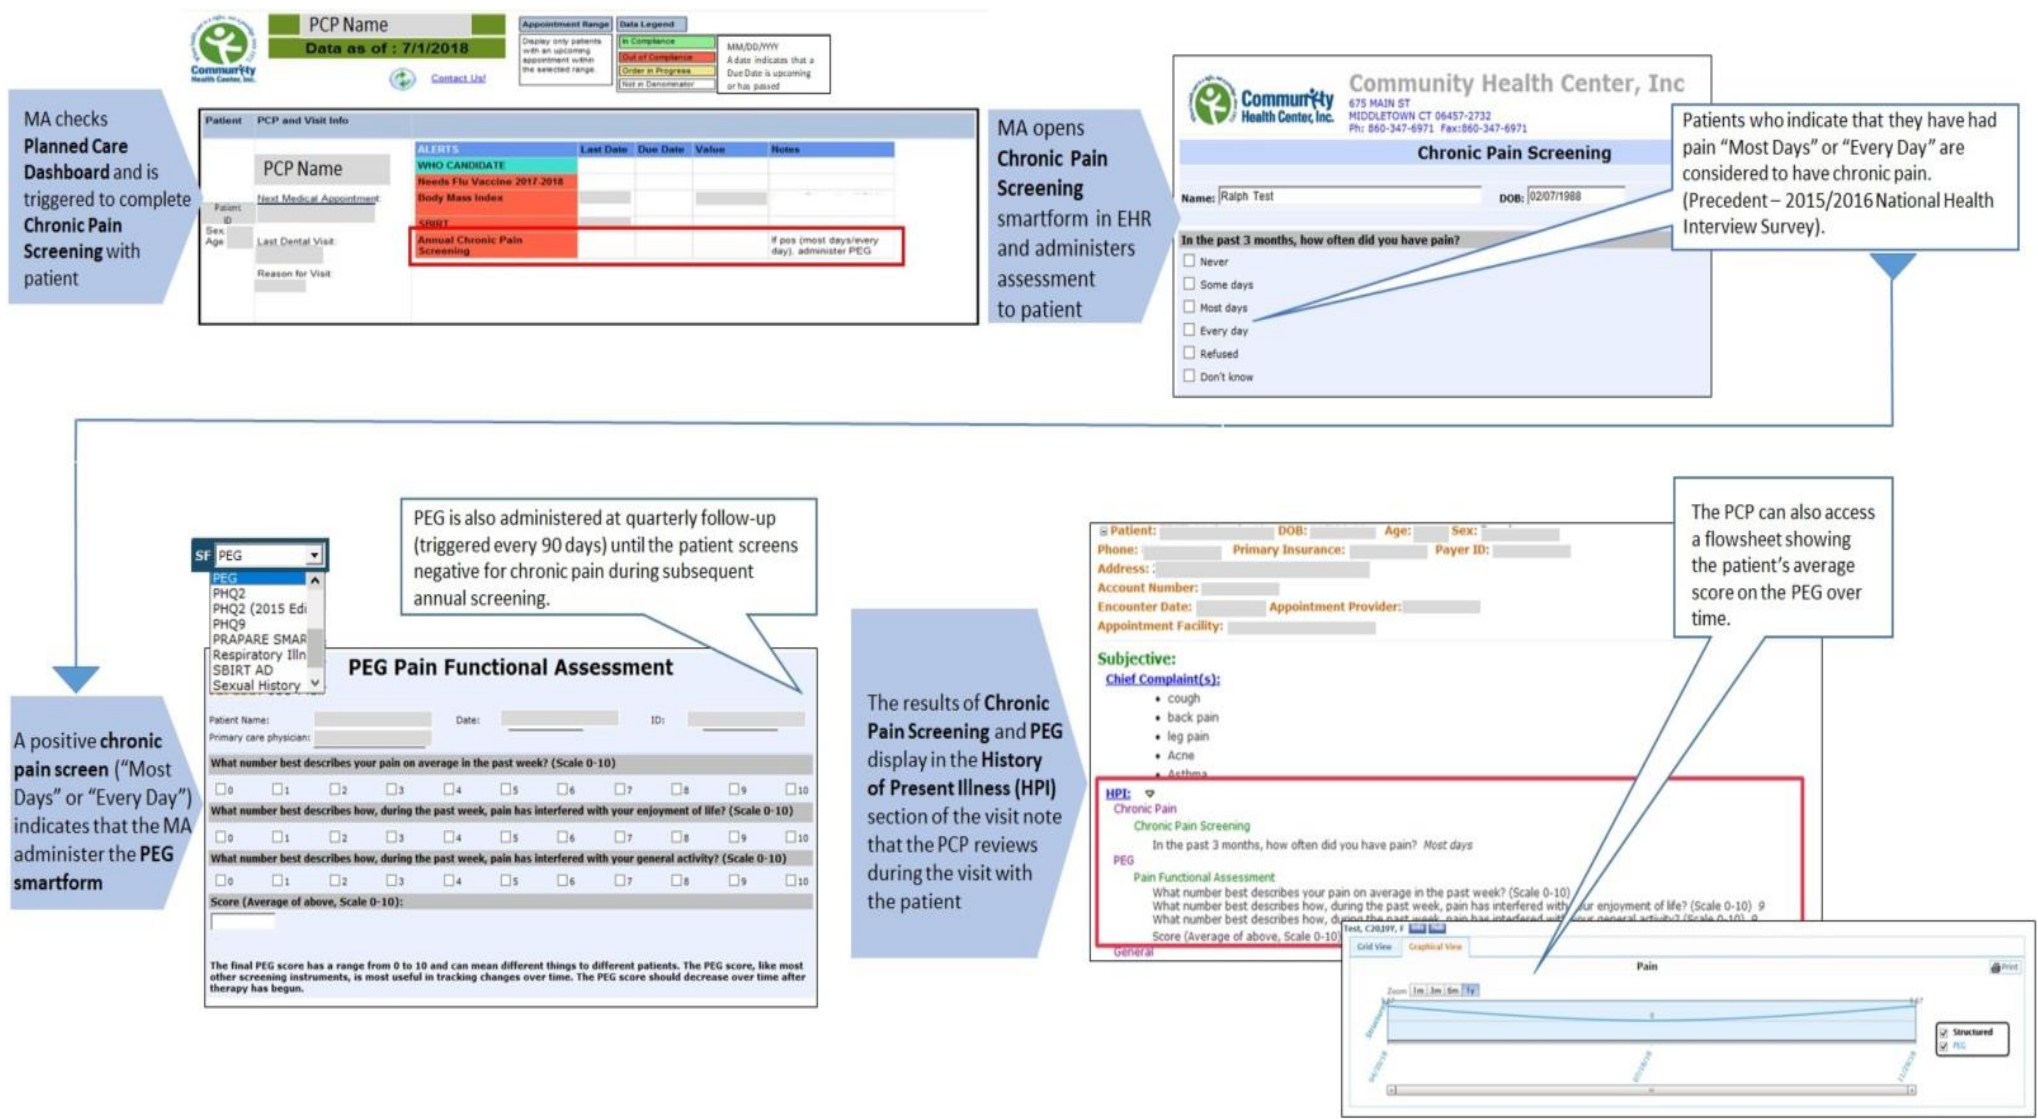

**eTable: List of chronic pain diagnoses.**

| ICD     | Description                                                     |
|---------|-----------------------------------------------------------------|
| M54.5   | Low back pain                                                   |
| M54.41  | Lumbago with sciatica, right side                               |
| M54.42  | Lumbago with sciatica, left side                                |
| M51.36  | Other intervertebral disc degeneration, lumbar region           |
| M54.16  | Radiculopathy, lumbar region                                    |
| M51.26  | Other intervertebral disc displacement, lumbar region           |
| M54.32  | Sciatica, left side                                             |
| M54.31  | Sciatica, right side                                            |
| M54.40  | Lumbago with sciatica, unspecified side                         |
| M54.30  | Sciatica, unspecified side                                      |
| M51.16  | Intervertebral disc disorders with radiculopathy, lumbar region |
| M53.3   | Sacrococcygeal disorders, not elsewhere classified              |
| M47.816 | Spondylosis without myelopathy or radiculopathy, lumbar region  |
| M99.03  | Segmental and somatic dysfunction of lumbar region              |
| M48.061 | Spinal stenosis, lumbar region without neurogenic claudication  |
| M54.17  | Radiculopathy, lumbosacral region                               |
| M48.06  | Spinal stenosis, lumbar region                                  |
| M96.1   | Postlaminectomy syndrome, not elsewhere classified              |
| M99.04  | Segmental and somatic dysfunction of sacral region              |
| M47.26  | Other spondylosis with radiculopathy, lumbar region             |
| M48.00  | Spinal stenosis, site unspecified                               |
| M46.90  | Unspecified inflammatory spondylopathy, site unspecified        |
| M48.062 | Spinal stenosis, lumbar region with neurogenic claudication     |
| M51.37  | Other intervertebral disc degeneration, lumbosacral region      |
| M53.86  | Other specified dorsopathies, lumbar region                     |
| M47.9   | Spondylosis, unspecified                                        |
| M51.27  | Other intervertebral disc displacement, lumbosacral region      |
| M46.1   | Sacroiliitis, not elsewhere classified                          |

| ICD      | Description                                                                                 |
|----------|---------------------------------------------------------------------------------------------|
| M43.10   | Spondylolisthesis, site unspecified                                                         |
| M46.96   | Unspecified inflammatory spondylopathy, lumbar region                                       |
| M47.16   | Other spondylosis with myelopathy, lumbar region                                            |
| M47.896  | Other spondylosis, lumbar region                                                            |
| M43.16   | Spondylolisthesis, lumbar region                                                            |
| M47.817  | Spondylosis without myelopathy or radiculopathy, lumbosacral region                         |
| M53.87   | Other specified dorsopathies, lumbosacral region                                            |
| M43.06   | Spondylolysis, lumbar region                                                                |
| M48.07   | Spinal stenosis, lumbosacral region                                                         |
| M43.17   | Spondylolisthesis, lumbosacral region                                                       |
| M47.27   | Other spondylosis with radiculopathy, lumbosacral region                                    |
| M53.2X8  | Spinal instabilities, sacral and sacrococcygeal region                                      |
| M47.897  | Other spondylosis, lumbosacral region                                                       |
| M51.06   | Intervertebral disc disorders with myelopathy, lumbar region                                |
| M43.26   | Fusion of spine, lumbar region                                                              |
| M45.5    | Ankylosing spondylitis of thoracolumbar region                                              |
| M46.46   | Discitis, unspecified, lumbar region                                                        |
| M46.47   | Discitis, unspecified, lumbosacral region                                                   |
| M46.97   | Unspecified inflammatory spondylopathy, lumbosacral region                                  |
| M47.25   | Other spondylosis with radiculopathy, thoracolumbar region                                  |
| M47.818  | Spondylosis without myelopathy or radiculopathy, sacral and sacrococcygeal region           |
| M47.895  | Other spondylosis, thoracolumbar region                                                     |
| M48.56XA | Collapsed vertebra, not elsewhere classified, lumbar region, initial encounter for fracture |
| M51.47   | Schmorl's nodes, lumbosacral region                                                         |
| M53.2X6  | Spinal instabilities, lumbar region                                                         |
| M54.18   | Radiculopathy, sacral and sacrococcygeal region                                             |
| G89.4    | Chronic pain syndrome                                                                       |
| G89.29   | Other chronic pain                                                                          |
| Z79.899  | Other long term (current) drug therapy                                                      |

| ICD     | Description                                                                |
|---------|----------------------------------------------------------------------------|
| G89.21  | Chronic pain due to trauma                                                 |
| Z79.891 | Long term (current) use of opiate analgesic                                |
| M47.819 | Spondylosis without myelopathy or radiculopathy, site unspecified          |
| F45.41  | Pain disorder exclusively related to psychological factors                 |
| F45.42  | Pain disorder with related psychological factors                           |
| G89.0   | Central pain syndrome                                                      |
| M15.3   | Secondary multiple arthritis                                               |
| R51     | Headache                                                                   |
| G43.009 | Migraine without aura, not intractable, without status migrainosus         |
| G43.909 | Migraine, unspecified, not intractable, without status migrainosus         |
| G43.109 | Migraine with aura, not intractable, without status migrainosus            |
| G44.209 | Tension-type headache, unspecified, not intractable                        |
| G43.709 | Chronic migraine without aura, not intractable, without status migrainosus |
| G44.52  | New daily persistent headache (NDPH)                                       |
| G44.89  | Other headache syndrome                                                    |
| G43.019 | Migraine without aura, intractable, without status migrainosus             |
| G43.119 | Migraine with aura, intractable, without status migrainosus                |
| G44.219 | Episodic tension-type headache, not intractable                            |
| G43.919 | Migraine, unspecified, intractable, without status migrainosus             |
| G43.001 | Migraine without aura, not intractable, with status migrainosus            |
| G44.229 | Chronic tension-type headache, not intractable                             |
| G43.101 | Migraine with aura, not intractable, with status migrainosus               |
| G44.211 | Episodic tension-type headache, intractable                                |
| G44.201 | Tension-type headache, unspecified, intractable                            |
| G44.309 | Post-traumatic headache, unspecified, not intractable                      |
| G43.809 | Other migraine, not intractable, without status migrainosus                |
| G44.019 | Episodic cluster headache, not intractable                                 |
| M71.21  | Synovial cyst of popliteal space [Baker], right knee                       |
| G44.329 | Chronic post-traumatic headache, not intractable                           |
| G43.011 | Migraine without aura, intractable, with status migrainosus                |

| ICD     | Description                                                                                       |
|---------|---------------------------------------------------------------------------------------------------|
| G43.111 | Migraine with aura, intractable, with status migrainosus                                          |
| G43.509 | Persistent migraine aura without cerebral infarction, not intractable, without status migrainosus |
| G43.901 | Migraine, unspecified, not intractable, with status migrainosus                                   |
| G44.009 | Cluster headache syndrome, unspecified, not intractable                                           |
| G44.221 | Chronic tension-type headache, intractable                                                        |
| G44.40  | Drug-induced headache, not elsewhere classified, not intractable                                  |
| G43.519 | Persistent migraine aura without cerebral infarction, intractable, without status migrainosus     |
| G44.1   | Vascular headache, not elsewhere classified                                                       |
| G44.82  | Headache associated with sexual activity                                                          |
| G43.701 | Chronic migraine without aura, not intractable, with status migrainosus                           |
| G43.819 | Other migraine, intractable, without status migrainosus                                           |
| G44.011 | Episodic cluster headache, intractable                                                            |
| G44.039 | Episodic paroxysmal hemicrania, not intractable                                                   |
| G44.321 | Chronic post-traumatic headache, intractable                                                      |
| G44.59  | Other complicated headache syndrome                                                               |
| G43.401 | Hemiplegic migraine, not intractable, with status migrainosus                                     |
| G43.501 | Persistent migraine aura without cerebral infarction, not intractable, with status migrainosus    |
| G43.719 | Chronic migraine without aura, intractable, without status migrainosus                            |
| G43.811 | Other migraine, intractable, with status migrainosus                                              |
| G43.829 | Menstrual migraine, not intractable, without status migrainosus                                   |
| G44.001 | Cluster headache syndrome, unspecified, intractable                                               |
| G44.021 | Chronic cluster headache, intractable                                                             |
| G44.029 | Chronic cluster headache, not intractable                                                         |
| G44.059 | Short lasting unilateral neuralgiform headache with conjunctival injection and tearing            |
| G44.301 | Post-traumatic headache, unspecified, intractable                                                 |
| G44.319 | Acute post-traumatic headache, not intractable                                                    |
| G44.81  | Hypnic headache                                                                                   |

| ICD     | Description                                   |
|---------|-----------------------------------------------|
| G44.85  | Primary stabbing headache                     |
| M25.561 | Pain in right knee                            |
| M25.562 | Pain in left knee                             |
| M25.50  | Pain in unspecified joint                     |
| M25.511 | Pain in right shoulder                        |
| M25.512 | Pain in left shoulder                         |
| M79.671 | Pain in right foot                            |
| M25.551 | Pain in right hip                             |
| M79.672 | Pain in left foot                             |
| M25.552 | Pain in left hip                              |
| M19.90  | Unspecified osteoarthritis, unspecified site  |
| M79.604 | Pain in right leg                             |
| M17.0   | Bilateral primary osteoarthritis of knee      |
| M79.605 | Pain in left leg                              |
| M79.641 | Pain in right hand                            |
| M25.569 | Pain in unspecified knee                      |
| M25.571 | Pain in right ankle and joints of right foot  |
| M25.572 | Pain in left ankle and joints of left foot    |
| M25.531 | Pain in right wrist                           |
| M17.11  | Unilateral primary osteoarthritis, right knee |
| M79.642 | Pain in left hand                             |
| M25.532 | Pain in left wrist                            |
| M25.521 | Pain in right elbow                           |
| M77.42  | Metatarsalgia, left foot                      |
| M77.41  | Metatarsalgia, right foot                     |
| M79.602 | Pain in left arm                              |
| M17.12  | Unilateral primary osteoarthritis, left knee  |
| M25.519 | Pain in unspecified shoulder                  |
| M79.601 | Pain in right arm                             |
| M25.522 | Pain in left elbow                            |

| ICD     | Description                                                                                  |
|---------|----------------------------------------------------------------------------------------------|
| M54.10  | Radiculopathy, site unspecified                                                              |
| M20.41  | Other hammer toe(s) (acquired), right foot                                                   |
| M20.42  | Other hammer toe(s) (acquired), left foot                                                    |
| M79.675 | Pain in left toe(s)                                                                          |
| M79.674 | Pain in right toe(s)                                                                         |
| M65.4   | Radial styloid tenosynovitis [de Quervain]                                                   |
| M16.11  | Unilateral primary osteoarthritis, right hip                                                 |
| M77.11  | Lateral epicondylitis, right elbow                                                           |
| M75.101 | Unspecified rotator cuff tear or rupture of right shoulder, not specified as traumatic       |
| M16.0   | Bilateral primary osteoarthritis of hip                                                      |
| M79.644 | Pain in right finger(s)                                                                      |
| M77.12  | Lateral epicondylitis, left elbow                                                            |
| M79.606 | Pain in leg, unspecified                                                                     |
| M19.011 | Primary osteoarthritis, right shoulder                                                       |
| M25.559 | Pain in unspecified hip                                                                      |
| M23.91  | Unspecified internal derangement of right knee                                               |
| M75.100 | Unspecified rotator cuff tear or rupture of unspecified shoulder, not specified as traumatic |
| M16.12  | Unilateral primary osteoarthritis, left hip                                                  |
| M75.102 | Unspecified rotator cuff tear or rupture of left shoulder, not specified as traumatic        |
| M79.662 | Pain in left lower leg                                                                       |
| M79.645 | Pain in left finger(s)                                                                       |
| M79.673 | Pain in unspecified foot                                                                     |
| M25.541 | Pain in joints of right hand                                                                 |
| M65.30  | Trigger finger, unspecified finger                                                           |
| M15.9   | Polyosteoarthritis, unspecified                                                              |
| M77.10  | Lateral epicondylitis, unspecified elbow                                                     |
| M79.661 | Pain in right lower leg                                                                      |
| M13.0   | Polyarthrititis, unspecified                                                                 |



| ICD     | Description                                                            |
|---------|------------------------------------------------------------------------|
| M23.92  | Unspecified internal derangement of left knee                          |
| M67.911 | Unspecified disorder of synovium and tendon, right shoulder            |
| M79.609 | Pain in unspecified limb                                               |
| M19.012 | Primary osteoarthritis, left shoulder                                  |
| M25.461 | Effusion, right knee                                                   |
| M25.542 | Pain in joints of left hand                                            |
| M70.62  | Trochanteric bursitis, left hip                                        |
| M75.81  | Other shoulder lesions, right shoulder                                 |
| M53.9   | Dorsopathy, unspecified                                                |
| M76.62  | Achilles tendinitis, left leg                                          |
| M79.643 | Pain in unspecified hand                                               |
| M21.611 | Bunion of right foot                                                   |
| M25.462 | Effusion, left knee                                                    |
| M75.41  | Impingement syndrome of right shoulder                                 |
| M21.612 | Bunion of left foot                                                    |
| M70.61  | Trochanteric bursitis, right hip                                       |
| M76.61  | Achilles tendinitis, right leg                                         |
| M12.811 | Other specific arthropathies, not elsewhere classified, right shoulder |
| M15.0   | Primary generalized (osteo)arthritis                                   |
| M65.332 | Trigger finger, left middle finger                                     |
| M67.912 | Unspecified disorder of synovium and tendon, left shoulder             |
| M65.311 | Trigger thumb, right thumb                                             |
| M77.32  | Calcaneal spur, left foot                                              |
| M79.622 | Pain in left upper arm                                                 |
| M19.041 | Primary osteoarthritis, right hand                                     |
| M21.619 | Bunion of unspecified foot                                             |
| M21.6X1 | Other acquired deformities of right foot                               |
| M67.431 | Ganglion, right wrist                                                  |
| M70.60  | Trochanteric bursitis, unspecified hip                                 |
| M12.9   | Arthropathy, unspecified                                               |

| ICD     | Description                                                           |
|---------|-----------------------------------------------------------------------|
| M25.40  | Effusion, unspecified joint                                           |
| M25.579 | Pain in unspecified ankle and joints of unspecified foot              |
| M65.331 | Trigger finger, right middle finger                                   |
| M75.01  | Adhesive capsulitis of right shoulder                                 |
| M20.21  | Hallux rigidus, right foot                                            |
| M23.90  | Unspecified internal derangement of unspecified knee                  |
| M25.774 | Osteophyte, right foot                                                |
| M75.02  | Adhesive capsulitis of left shoulder                                  |
| M19.049 | Primary osteoarthritis, unspecified hand                              |
| M21.961 | Unspecified acquired deformity of right lower leg                     |
| M25.472 | Effusion, left ankle                                                  |
| M65.341 | Trigger finger, right ring finger                                     |
| M70.50  | Other bursitis of knee, unspecified knee                              |
| M71.22  | Synovial cyst of popliteal space [Baker], left knee                   |
| M75.82  | Other shoulder lesions, left shoulder                                 |
| M79.603 | Pain in arm, unspecified                                              |
| M95.8   | Other specified acquired deformities of musculoskeletal system        |
| M12.812 | Other specific arthropathies, not elsewhere classified, left shoulder |
| M19.019 | Primary osteoarthritis, unspecified shoulder                          |
| M21.6X2 | Other acquired deformities of left foot                               |
| M22.2X1 | Patellofemoral disorders, right knee                                  |
| M25.539 | Pain in unspecified wrist                                             |
| M25.549 | Pain in joints of unspecified hand                                    |
| M70.21  | Olecranon bursitis, right elbow                                       |
| M77.01  | Medial epicondylitis, right elbow                                     |
| M77.31  | Calcaneal spur, right foot                                            |
| M79.621 | Pain in right upper arm                                               |
| M79.646 | Pain in unspecified finger(s)                                         |
| M79.651 | Pain in right thigh                                                   |
| M75.21  | Bicipital tendinitis, right shoulder                                  |

| ICD     | Description                                                                          |
|---------|--------------------------------------------------------------------------------------|
| M75.22  | Bicipital tendinitis, left shoulder                                                  |
| M75.42  | Impingement syndrome of left shoulder                                                |
| M19.042 | Primary osteoarthritis, left hand                                                    |
| M19.071 | Primary osteoarthritis, right ankle and foot                                         |
| M19.91  | Primary osteoarthritis, unspecified site                                             |
| M20.22  | Hallux rigidus, left foot                                                            |
| M21.969 | Unspecified acquired deformity of unspecified lower leg                              |
| M25.473 | Effusion, unspecified ankle                                                          |
| M25.775 | Osteophyte, left foot                                                                |
| M25.9   | Joint disorder, unspecified                                                          |
| M65.342 | Trigger finger, left ring finger                                                     |
| M67.90  | Unspecified disorder of synovium and tendon, unspecified site                        |
| M15.8   | Other polyosteoarthritis                                                             |
| M19.072 | Primary osteoarthritis, left ankle and foot                                          |
| M19.079 | Primary osteoarthritis, unspecified ankle and foot                                   |
| M25.471 | Effusion, right ankle                                                                |
| M25.60  | Stiffness of unspecified joint, not elsewhere classified                             |
| M65.9   | Synovitis and tenosynovitis, unspecified                                             |
| M70.22  | Olecranon bursitis, left elbow                                                       |
| M75.112 | Incomplete rotator cuff tear or rupture of left shoulder, not specified as traumatic |
| M21.622 | Bunionette of left foot                                                              |
| M21.962 | Unspecified acquired deformity of left lower leg                                     |
| M65.321 | Trigger finger, right index finger                                                   |
| M72.0   | Palmar fascial fibromatosis [Dupuytren]                                              |
| M72.9   | Fibroblastic disorder, unspecified                                                   |
| M75.122 | Complete rotator cuff tear or rupture of left shoulder, not specified as traumatic   |
| M75.51  | Bursitis of right shoulder                                                           |
| M77.02  | Medial epicondylitis, left elbow                                                     |
| M79.631 | Pain in right forearm                                                                |
| M79.652 | Pain in left thigh                                                                   |

| ICD     | Description                                                                         |
|---------|-------------------------------------------------------------------------------------|
| G90.521 | Complex regional pain syndrome I of right lower limb                                |
| M12.88  | Other specific arthropathies, not elsewhere classified, other specified site        |
| M21.6X9 | Other acquired deformities of unspecified foot                                      |
| M23.204 | Derangement of unspecified medial meniscus due to old tear or injury, left knee     |
| M23.8X1 | Other internal derangements of right knee                                           |
| M24.811 | Other specific joint derangements of right shoulder, not elsewhere classified       |
| M25.372 | Other instability, left ankle                                                       |
| M25.529 | Pain in unspecified elbow                                                           |
| M25.619 | Stiffness of unspecified shoulder, not elsewhere classified                         |
| M65.312 | Trigger thumb, left thumb                                                           |
| M67.919 | Unspecified disorder of synovium and tendon, unspecified shoulder                   |
| M75.121 | Complete rotator cuff tear or rupture of right shoulder, not specified as traumatic |
| M75.52  | Bursitis of left shoulder                                                           |
| M76.891 | Other specified enthesopathies of right lower limb, excluding foot                  |
| M77.30  | Calcaneal spur, unspecified foot                                                    |
| M77.52  | Other enthesopathy of left foot                                                     |
| M79.669 | Pain in unspecified lower leg                                                       |
| G90.522 | Complex regional pain syndrome I of left lower limb                                 |
| M19.032 | Primary osteoarthritis, left wrist                                                  |
| M22.2X2 | Patellofemoral disorders, left knee                                                 |
| M22.41  | Chondromalacia patellae, right knee                                                 |
| M23.8X2 | Other internal derangements of left knee                                            |
| M24.411 | Recurrent dislocation, right shoulder                                               |
| M24.812 | Other specific joint derangements of left shoulder, not elsewhere classified        |
| M25.361 | Other instability, right knee                                                       |
| M25.362 | Other instability, left knee                                                        |
| M25.469 | Effusion, unspecified knee                                                          |
| M25.611 | Stiffness of right shoulder, not elsewhere classified                               |
| M25.641 | Stiffness of right hand, not elsewhere classified                                   |
| M65.319 | Trigger thumb, unspecified thumb                                                    |

| ICD     | Description                                                                                 |
|---------|---------------------------------------------------------------------------------------------|
| M67.449 | Ganglion, unspecified hand                                                                  |
| M70.52  | Other bursitis of knee, left knee                                                           |
| M75.00  | Adhesive capsulitis of unspecified shoulder                                                 |
| M75.110 | Incomplete rotator cuff tear or rupture of unspecified shoulder, not specified as traumatic |
| M76.51  | Patellar tendinitis, right knee                                                             |
| M76.892 | Other specified enthesopathies of left lower limb, excluding foot                           |
| M77.00  | Medial epicondylitis, unspecified elbow                                                     |
| M77.50  | Other enthesopathy of unspecified foot                                                      |
| M79.632 | Pain in left forearm                                                                        |
| M79.659 | Pain in unspecified thigh                                                                   |
| G90.511 | Complex regional pain syndrome I of right upper limb                                        |
| G90.523 | Complex regional pain syndrome I of lower limb, bilateral                                   |
| M12.511 | Traumatic arthropathy, right shoulder                                                       |
| M12.562 | Traumatic arthropathy, left knee                                                            |
| M13.80  | Other specified arthritis, unspecified site                                                 |
| M14.679 | Charcot's joint, unspecified ankle and foot                                                 |
| M15.4   | Erosive (osteo)arthritis                                                                    |
| M18.11  | Unilateral primary osteoarthritis of first carpometacarpal joint, right hand                |
| M18.12  | Unilateral primary osteoarthritis of first carpometacarpal joint, left hand                 |
| M19.111 | Post-traumatic osteoarthritis, right shoulder                                               |
| M20.31  | Hallux varus (acquired), right foot                                                         |
| M20.32  | Hallux varus (acquired), left foot                                                          |
| M20.5X2 | Other deformities of toe(s) (acquired), left foot                                           |
| M21.40  | Flat foot [pes planus] (acquired), unspecified foot                                         |
| M23.206 | Derangement of unspecified meniscus due to old tear or injury, right knee                   |
| M23.51  | Chronic instability of knee, right knee                                                     |
| M24.552 | Contracture, left hip                                                                       |
| M24.562 | Contracture, left knee                                                                      |
| M24.571 | Contracture, right ankle                                                                    |

| ICD     | Description                                                                           |
|---------|---------------------------------------------------------------------------------------|
| M25.30  | Other instability, unspecified joint                                                  |
| M25.371 | Other instability, right ankle                                                        |
| M25.422 | Effusion, left elbow                                                                  |
| M25.476 | Effusion, unspecified foot                                                            |
| M25.612 | Stiffness of left shoulder, not elsewhere classified                                  |
| M25.642 | Stiffness of left hand, not elsewhere classified                                      |
| M25.649 | Stiffness of unspecified hand, not elsewhere classified                               |
| M25.662 | Stiffness of left knee, not elsewhere classified                                      |
| M25.80  | Other specified joint disorders, unspecified joint                                    |
| M25.851 | Other specified joint disorders, right hip                                            |
| M65.322 | Trigger finger, left index finger                                                     |
| M65.351 | Trigger finger, right little finger                                                   |
| M67.432 | Ganglion, left wrist                                                                  |
| M67.442 | Ganglion, left hand                                                                   |
| M67.471 | Ganglion, right ankle and foot                                                        |
| M67.472 | Ganglion, left ankle and foot                                                         |
| M67.98  | Unspecified disorder of synovium and tendon, other site                               |
| M70.32  | Other bursitis of elbow, left elbow                                                   |
| M70.42  | Prepatellar bursitis, left knee                                                       |
| M70.51  | Other bursitis of knee, right knee                                                    |
| M70.71  | Other bursitis of hip, right hip                                                      |
| M71.349 | Other bursal cyst, unspecified hand                                                   |
| M75.111 | Incomplete rotator cuff tear or rupture of right shoulder, not specified as traumatic |
| M75.20  | Bicipital tendinitis, unspecified shoulder                                            |
| M75.31  | Calcific tendinitis of right shoulder                                                 |
| M75.32  | Calcific tendinitis of left shoulder                                                  |
| M75.92  | Shoulder lesion, unspecified, left shoulder                                           |
| M76.01  | Gluteal tendinitis, right hip                                                         |
| M76.02  | Gluteal tendinitis, left hip                                                          |

| ICD     | Description                                                                          |
|---------|--------------------------------------------------------------------------------------|
| M76.31  | Iliotibial band syndrome, right leg                                                  |
| M76.60  | Achilles tendinitis, unspecified leg                                                 |
| M76.822 | Posterior tibial tendinitis, left leg                                                |
| M77.40  | Metatarsalgia, unspecified foot                                                      |
| M77.51  | Other enthesopathy of right foot                                                     |
| M12.529 | Traumatic arthropathy, unspecified elbow                                             |
| M12.551 | Traumatic arthropathy, right hip                                                     |
| M12.571 | Traumatic arthropathy, right ankle and foot                                          |
| M12.819 | Other specific arthropathies, not elsewhere classified, unspecified shoulder         |
| M12.861 | Other specific arthropathies, not elsewhere classified, right knee                   |
| M13.161 | Monoarthritis, not elsewhere classified, right knee                                  |
| M14.60  | Charcot's joint, unspecified site                                                    |
| M14.671 | Charcot's joint, right ankle and foot                                                |
| M15.2   | Bouchard's nodes (with arthropathy)                                                  |
| M18.0   | Bilateral primary osteoarthritis of first carpometacarpal joints                     |
| M18.10  | Unilateral primary osteoarthritis of first carpometacarpal joint, unspecified hand   |
| M18.51  | Other unilateral secondary osteoarthritis of first carpometacarpal joint, right hand |
| M19.021 | Primary osteoarthritis, right elbow                                                  |
| M19.022 | Primary osteoarthritis, left elbow                                                   |
| M19.031 | Primary osteoarthritis, right wrist                                                  |
| M19.131 | Post-traumatic osteoarthritis, right wrist                                           |
| M19.211 | Secondary osteoarthritis, right shoulder                                             |
| M20.001 | Unspecified deformity of right finger(s)                                             |
| M20.002 | Unspecified deformity of left finger(s)                                              |
| M20.011 | Mallet finger of right finger(s)                                                     |
| M20.032 | Swan-neck deformity of left finger(s)                                                |
| M20.5X1 | Other deformities of toe(s) (acquired), right foot                                   |
| M21.00  | Valgus deformity, not elsewhere classified, unspecified site                         |
| M21.069 | Valgus deformity, not elsewhere classified, unspecified knee                         |
| M21.621 | Bunionette of right foot                                                             |

| ICD     | Description                                                                             |
|---------|-----------------------------------------------------------------------------------------|
| M21.921 | Unspecified acquired deformity of right upper arm                                       |
| M21.931 | Unspecified acquired deformity of right forearm                                         |
| M21.932 | Unspecified acquired deformity of left forearm                                          |
| M21.941 | Unspecified acquired deformity of hand, right hand                                      |
| M21.949 | Unspecified acquired deformity of hand, unspecified hand                                |
| M22.42  | Chondromalacia patellae, left knee                                                      |
| M23.207 | Derangement of unspecified meniscus due to old tear or injury, left knee                |
| M23.209 | Derangement of unspecified meniscus due to old tear or injury, unspecified knee         |
| M23.221 | Derangement of posterior horn of medial meniscus due to old tear or injury, right knee  |
| M23.251 | Derangement of posterior horn of lateral meniscus due to old tear or injury, right knee |
| M23.307 | Other meniscus derangements, unspecified meniscus, left knee                            |
| M23.312 | Other meniscus derangements, anterior horn of medial meniscus, left knee                |
| M23.321 | Other meniscus derangements, posterior horn of medial meniscus, right knee              |
| M23.351 | Other meniscus derangements, posterior horn of lateral meniscus, right knee             |
| M23.352 | Other meniscus derangements, posterior horn of lateral meniscus, left knee              |
| M23.42  | Loose body in knee, left knee                                                           |
| M23.52  | Chronic instability of knee, left knee                                                  |
| M23.8X9 | Other internal derangements of unspecified knee                                         |
| M24.20  | Disorder of ligament, unspecified site                                                  |
| M24.272 | Disorder of ligament, left ankle                                                        |
| M24.311 | Pathological dislocation of right shoulder, not elsewhere classified                    |
| M24.312 | Pathological dislocation of left shoulder, not elsewhere classified                     |
| M24.412 | Recurrent dislocation, left shoulder                                                    |
| M24.452 | Recurrent dislocation, left hip                                                         |
| M24.541 | Contracture, right hand                                                                 |
| M24.561 | Contracture, right knee                                                                 |
| M24.572 | Contracture, left ankle                                                                 |
| M24.573 | Contracture, unspecified ankle                                                          |
| M24.80  | Other specific joint derangements of unspecified joint, not elsewhere classified        |



| ICD     | Description                                                                     |
|---------|---------------------------------------------------------------------------------|
| M24.821 | Other specific joint derangements of right elbow, not elsewhere classified      |
| M24.849 | Other specific joint derangements of unspecified hand, not elsewhere classified |
| M24.852 | Other specific joint derangements of left hip, not elsewhere classified         |
| M24.9   | Joint derangement, unspecified                                                  |
| M25.369 | Other instability, unspecified knee                                             |
| M25.411 | Effusion, right shoulder                                                        |
| M25.412 | Effusion, left shoulder                                                         |
| M25.421 | Effusion, right elbow                                                           |
| M25.441 | Effusion, right hand                                                            |
| M25.442 | Effusion, left hand                                                             |
| M25.449 | Effusion, unspecified hand                                                      |
| M25.621 | Stiffness of right elbow, not elsewhere classified                              |
| M25.661 | Stiffness of right knee, not elsewhere classified                               |
| M25.739 | Osteophyte, unspecified wrist                                                   |
| M25.771 | Osteophyte, right ankle                                                         |
| M25.841 | Other specified joint disorders, right hand                                     |
| M25.859 | Other specified joint disorders, unspecified hip                                |
| M25.861 | Other specified joint disorders, right knee                                     |
| M60.829 | Other myositis, unspecified upper arm                                           |
| M65.20  | Calcific tendinitis, unspecified site                                           |
| M65.28  | Calcific tendinitis, other site                                                 |
| M65.359 | Trigger finger, unspecified little finger                                       |
| M65.841 | Other synovitis and tenosynovitis, right hand                                   |
| M67.02  | Short Achilles tendon (acquired), left ankle                                    |
| M67.441 | Ganglion, right hand                                                            |
| M67.52  | Plica syndrome, left knee                                                       |
| M67.922 | Unspecified disorder of synovium and tendon, left upper arm                     |
| M70.30  | Other bursitis of elbow, unspecified elbow                                      |
| M70.72  | Other bursitis of hip, left hip                                                 |
| M71.20  | Synovial cyst of popliteal space [Baker], unspecified knee                      |

| ICD     | Description                                                                            |
|---------|----------------------------------------------------------------------------------------|
| M71.312 | Other bursal cyst, left shoulder                                                       |
| M71.321 | Other bursal cyst, right elbow                                                         |
| M71.332 | Other bursal cyst, left wrist                                                          |
| M71.9   | Bursopathy, unspecified                                                                |
| M75.40  | Impingement syndrome of unspecified shoulder                                           |
| M76.11  | Psoas tendinitis, right hip                                                            |
| M76.12  | Psoas tendinitis, left hip                                                             |
| M76.30  | Iliotibial band syndrome, unspecified leg                                              |
| M76.32  | Iliotibial band syndrome, left leg                                                     |
| M76.50  | Patellar tendinitis, unspecified knee                                                  |
| M76.52  | Patellar tendinitis, left knee                                                         |
| M76.71  | Peroneal tendinitis, right leg                                                         |
| M76.821 | Posterior tibial tendinitis, right leg                                                 |
| M76.829 | Posterior tibial tendinitis, unspecified leg                                           |
| M76.899 | Other specified enthesopathies of unspecified lower limb, excluding foot               |
| M79.639 | Pain in unspecified forearm                                                            |
| M79.676 | Pain in unspecified toe(s)                                                             |
| M79.7   | Fibromyalgia                                                                           |
| M06.9   | Rheumatoid arthritis, unspecified                                                      |
| M10.9   | Gout, unspecified                                                                      |
| M77.9   | Enthesopathy, unspecified                                                              |
| M77.8   | Other enthesopathies, not elsewhere classified                                         |
| M05.79  | Rheumatoid arthritis with rheumatoid factor of multiple sites without organ or systems |
| M45.9   | Ankylosing spondylitis of unspecified sites in spine                                   |
| M05.9   | Rheumatoid arthritis with rheumatoid factor, unspecified                               |
| M10.072 | Idiopathic gout, left ankle and foot                                                   |
| M15.1   | Heberden's nodes (with arthropathy)                                                    |
| M06.00  | Rheumatoid arthritis without rheumatoid factor, unspecified site                       |
| M08.00  | Unspecified juvenile rheumatoid arthritis of unspecified site                          |

| ICD     | Description                                                                                              |
|---------|----------------------------------------------------------------------------------------------------------|
| M10.00  | Idiopathic gout, unspecified site                                                                        |
| M10.071 | Idiopathic gout, right ankle and foot                                                                    |
| M10.079 | Idiopathic gout, unspecified ankle and foot                                                              |
| M10.09  | Idiopathic gout, multiple sites                                                                          |
| M11.20  | Other chondrocalcinosis, unspecified site                                                                |
| M02.30  | Reiter's disease, unspecified site                                                                       |
| M05.711 | Rheumatoid arthritis with rheumatoid factor of right shoulder without organ or systems involvement       |
| M05.741 | Rheumatoid arthritis with rheumatoid factor of right hand without organ or systems involvement           |
| M05.771 | Rheumatoid arthritis with rheumatoid factor of right ankle and foot without organ or systems involvement |
| M05.772 | Rheumatoid arthritis with rheumatoid factor of left ankle and foot without organ or systems involvement  |
| M05.89  | Other rheumatoid arthritis with rheumatoid factor of multiple sites                                      |
| M06.021 | Rheumatoid arthritis without rheumatoid factor, right elbow                                              |
| M06.09  | Rheumatoid arthritis without rheumatoid factor, multiple sites                                           |
| M06.30  | Rheumatoid nodule, unspecified site                                                                      |
| M06.4   | Inflammatory polyarthropathy                                                                             |
| M10.032 | Idiopathic gout, left wrist                                                                              |
| M10.069 | Idiopathic gout, unspecified knee                                                                        |
| M10.472 | Other secondary gout, left ankle and foot                                                                |
| M79.2   | Neuralgia and neuritis, unspecified                                                                      |
| G50.0   | Trigeminal neuralgia                                                                                     |
| G60.9   | Hereditary and idiopathic neuropathy, unspecified                                                        |
| M54.81  | Occipital neuralgia                                                                                      |
| G60.3   | Idiopathic progressive neuropathy                                                                        |
| M54.9   | Dorsalgia, unspecified                                                                                   |
| M54.2   | Cervicalgia                                                                                              |
| M54.6   | Pain in thoracic spine                                                                                   |
| M54.12  | Radiculopathy, cervical region                                                                           |

| ICD      | Description                                                                                   |
|----------|-----------------------------------------------------------------------------------------------|
| M51.9    | Unspecified thoracic, thoracolumbar and lumbosacral intervertebral disc disorder              |
| M50.30   | Other cervical disc degeneration, unspecified cervical region                                 |
| M50.20   | Other cervical disc displacement, unspecified cervical region                                 |
| M50.90   | Cervical disc disorder, unspecified, unspecified cervical region                              |
| M47.812  | Spondylosis without myelopathy or radiculopathy, cervical region                              |
| M48.02   | Spinal stenosis, cervical region                                                              |
| M47.22   | Other spondylosis with radiculopathy, cervical region                                         |
| M51.34   | Other intervertebral disc degeneration, thoracic region                                       |
| M46.92   | Unspecified inflammatory spondylopathy, cervical region                                       |
| M54.89   | Other dorsalgia                                                                               |
| M79.12   | Myalgia of auxiliary muscles, head and neck                                                   |
| M47.12   | Other spondylosis with myelopathy, cervical region                                            |
| M53.82   | Other specified dorsopathies, cervical region                                                 |
| M51.24   | Other intervertebral disc displacement, thoracic region                                       |
| M48.54XA | Collapsed vertebra, not elsewhere classified, thoracic region, initial encounter for fracture |
| M43.02   | Spondylolysis, cervical region                                                                |
| M47.892  | Other spondylosis, cervical region                                                            |
| M54.14   | Radiculopathy, thoracic region                                                                |
| M25.78   | Osteophyte, vertebrae                                                                         |
| M43.22   | Fusion of spine, cervical region                                                              |
| M43.9    | Deforming dorsopathy, unspecified                                                             |
| M46.94   | Unspecified inflammatory spondylopathy, thoracic region                                       |
| M47.815  | Spondylosis without myelopathy or radiculopathy, thoracolumbar region                         |
| M50.00   | Cervical disc disorder with myelopathy, unspecified cervical region                           |
| M50.121  | Cervical disc disorder at C4-C5 level with radiculopathy                                      |
| M47.14   | Other spondylosis with myelopathy, thoracic region                                            |
| M47.894  | Other spondylosis, thoracic region                                                            |
| M48.03   | Spinal stenosis, cervicothoracic region                                                       |
| M48.04   | Spinal stenosis, thoracic region                                                              |

| ICD      | Description                                                                 |
|----------|-----------------------------------------------------------------------------|
| M50.022  | Cervical disc disorder at C5-C6 level with myelopathy                       |
| M50.10   | Cervical disc disorder with radiculopathy, unspecified cervical region      |
| M50.122  | Cervical disc disorder at C5-C6 level with radiculopathy                    |
| M50.21   | Other cervical disc displacement, high cervical region                      |
| M50.22   | Other cervical disc displacement, mid-cervical region                       |
| M50.220  | Other cervical disc displacement, mid-cervical region, unspecified level    |
| M50.223  | Other cervical disc displacement at C6-C7 level                             |
| M50.322  | Other cervical disc degeneration at C5-C6 level                             |
| M53.80   | Other specified dorsopathies, site unspecified                              |
| M72.2    | Plantar fascial fibromatosis                                                |
| M79.10   | Myalgia, unspecified site                                                   |
| M79.89   | Other specified soft tissue disorders                                       |
| R10.84   | Generalized abdominal pain                                                  |
| M79.18   | Myalgia, other site                                                         |
| G89.11   | Acute pain due to trauma                                                    |
| M79.1    | Myalgia                                                                     |
| G89.18   | Other acute postprocedural pain                                             |
| M79.9    | Soft tissue disorder, unspecified                                           |
| M1A.9XX0 | Chronic gout, unspecified, without tophus (tophi)                           |
| M43.6    | Torticollis                                                                 |
| G89.28   | Other chronic postprocedural pain                                           |
| M1A.0790 | Idiopathic chronic gout, unspecified ankle and foot, without tophus (tophi) |
| M1A.09X0 | Idiopathic chronic gout, multiple sites, without tophus (tophi)             |
| M60.9    | Myositis, unspecified                                                       |
| M1A.00X0 | Idiopathic chronic gout, unspecified site, without tophus (tophi)           |
| M1A.0710 | Idiopathic chronic gout, right ankle and foot, without tophus (tophi)       |
| M1A.9XX1 | Chronic gout, unspecified, with tophus (tophi)                              |
| G50.1    | Atypical facial pain                                                        |
| M79.3    | Panniculitis, unspecified                                                   |
| N30.10   | Interstitial cystitis (chronic) without hematuria                           |

| ICD      | Description                                                                                                                           |
|----------|---------------------------------------------------------------------------------------------------------------------------------------|
| M1A.40X0 | Other secondary chronic gout, unspecified site, without tophus (tophi)                                                                |
| G89.12   | Acute post-thoracotomy pain                                                                                                           |
| M60.80   | Other myositis, unspecified site                                                                                                      |
| G89.22   | Chronic post-thoracotomy pain                                                                                                         |
| M1A.00X1 | Idiopathic chronic gout, unspecified site, with tophus (tophi)                                                                        |
| M1A.0410 | Idiopathic chronic gout, right hand, without tophus (tophi)                                                                           |
| M1A.0620 | Idiopathic chronic gout, left knee, without tophus (tophi)                                                                            |
| M1A.0720 | Idiopathic chronic gout, left ankle and foot, without tophus (tophi)                                                                  |
| M1A.3710 | Chronic gout due to renal impairment, right ankle and foot, without tophus (tophi)                                                    |
| M1A.40X1 | Other secondary chronic gout, unspecified site, with tophus (tophi)                                                                   |
| M1A.4621 | Other secondary chronic gout, left knee, with tophus (tophi)                                                                          |
| M80.00XD | Age-related osteoporosis with current pathological fracture, unspecified site, subsequent encounter for fracture with routine healing |
| M80.08XA | Age-related osteoporosis with current pathological fracture, vertebra(e), initial encounter for fracture                              |
| M95.0    | Acquired deformity of nose                                                                                                            |
| M95.4    | Acquired deformity of chest and rib                                                                                                   |
| M95.9    | Acquired deformity of musculoskeletal system, unspecified                                                                             |
| G89.3    | Neoplasm related pain (acute) (chronic)                                                                                               |
| M42.00   | Juvenile osteochondrosis of spine, site unspecified                                                                                   |
| M43.00   | Spondylolysis, site unspecified                                                                                                       |
| M45.0    | Ankylosing spondylitis of multiple sites in spine                                                                                     |
| M46.00   | Spinal enthesopathy, site unspecified                                                                                                 |
| M47.10   | Other spondylosis with myelopathy, site unspecified                                                                                   |
| M47.20   | Other spondylosis with radiculopathy, site unspecified                                                                                |
| M47.899  | Other spondylosis, site unspecified                                                                                                   |
| M48.10   | Ankylosing hyperostosis [Forestier], site unspecified                                                                                 |
| M48.9    | Spondylopathy, unspecified                                                                                                            |
| M60.89   | Other myositis, multiple sites                                                                                                        |
